# Supplementary material for: Renal and Extrarenal Phenotypes in Patients With HNF1B Variants and Chromosome 17q12 Microdeletions
Source: PubMed Central journal article supplement — Kidney Int Rep. 2024 May 16;9(8):2514–26. doi: 10.1016/j.ekir.2024.05.007 (PMC11328578; doi:10.1016/j.ekir.2024.05.007), 2024-05-16
Supplement: mmc1.pdf [file mmc1.pdf]

**Supplementary Material to:**

**Renal and extra-renal phenotypes in patients with  
*HNF1B* variants and chromosome 17q12 micro deletions**

Buffin-Meyer and Richard et al.,

|                                                                            | <b>Page</b> |
|----------------------------------------------------------------------------|-------------|
| <b>1. Additional collaborators of the <i>HNF1B</i> variant study group</b> | <b>2</b>    |
| <b>2. Supplementary Figures S1-5</b>                                       | <b>3</b>    |
| <b>3. Supplementary Tables S1-2</b>                                        | <b>8</b>    |
| <b>4. STROBE Statement</b>                                                 | <b>13</b>   |

## 1. Additional collaborators of the *HNF1B* variant study group

Gema Ariceta<sup>#</sup>, MD, PhD (Pediatric Nephrology, University Hospital Vall d'Hebron, Barcelona, Spain); Elisa Benetti<sup>#</sup>, MD, PhD (Pediatric Nephrology, Dialysis and Transplant Unit, Department of Women's and Children's Health, Padua University Hospital, Padua, Italy); Marcus R Benz<sup>¶</sup>, MD (Pediatric Nephrology Dachau, Dachau, Germany); Anna Bjerre<sup>#</sup>, MD, PhD (Division of Pediatric and Adolescent Medicine, Oslo University Hospital, Oslo, Norway); Bernard R Boudailliez, MD (Service de Néphrologie Pédiatrique, Département de Pédiatrie, CHU Amiens, Amiens, France); Antonia Bouts<sup>#</sup>, MD, PhD (Emma Children's Hospital, Amsterdam University Medical Centers, Department of Pediatric Nephrology, Amsterdam Reproduction & Development, Amsterdam, the Netherlands); Jens Drube<sup>¶, #</sup>, (Department of Pediatric Kidney, Liver and Metabolic Diseases, Hannover Medical School Children's Hospital, Hannover, Germany); Ann Christin Gjerstad<sup>#</sup>, MD, PhD (Division of Pediatric and Adolescent Medicine, Oslo University Hospital, Oslo, Norway); Augustina Jankauskiene<sup>#</sup>, MD, PhD (Pediatric Center, Institute of Clinical Medicine, Vilnius University, Vilnius, Lithuania); Eszter Jávorszky<sup>#</sup>, PhD (MTA-SE Lendület Nephrogenetic Laboratory, Budapest, Hungary); Nadine Jay, MD (Service de Pédiatrie, CHU de Brest, Brest, France); Martin Kirschstein<sup>¶</sup>, MD, PhD (Department of Pediatrics, General Hospital, Celle, Germany); Nataša Marčun Varda<sup>#</sup>, MD, PhD (University Medical Centre Maribor, Department of Paediatrics, Maribor, Slovenia); Olivier Niel<sup>#</sup>, MD, PhD (Pediatric Nephrology, Centre Hospitalier de Luxembourg, Luxembourg, Luxembourg); François Nobili, MD (Service de Pédiatrie 2, CHU Besancon, Besancon, France); Christine Pietrement, MD, PhD (Unité de Néphrologie Pédiatrique CHU Reims, Reims, France); Dovile Ruzgiene<sup>#</sup>, MD (Pediatric Center, Institute of Clinical Medicine, Vilnius University, Vilnius, Lithuania); Raphael Schild<sup>¶, #</sup>, MD (University Children's Hospital, University Medical Center Hamburg Eppendorf, Hamburg, Germany); Hagen Staude<sup>¶</sup>, MD (Department of Pediatric Nephrology, University Children's Hospital, Rostock, Germany); Kálmán Tory<sup>#</sup>, MD, PhD (MTA-SE Lendület Nephrogenetic Laboratory, Budapest, Hungary); Michel Tsimaratos, MD, PhD (Pédiatrie Multidisciplinaire Timone, Aix-Marseille Université, Marseille, France); Ulrike Walden<sup>¶</sup>, MD (Paediatric and Adolescent Medicine, University Medical Center, Augsburg, Germany); Hildegard Zappel<sup>¶</sup>, MD (University Children's Hospital Göttingen, Göttingen, Germany).

<sup>#</sup> Member of the ERKNet network

<sup>¶</sup> Member of the Neocyst consortium

## 2. Supplementary figures

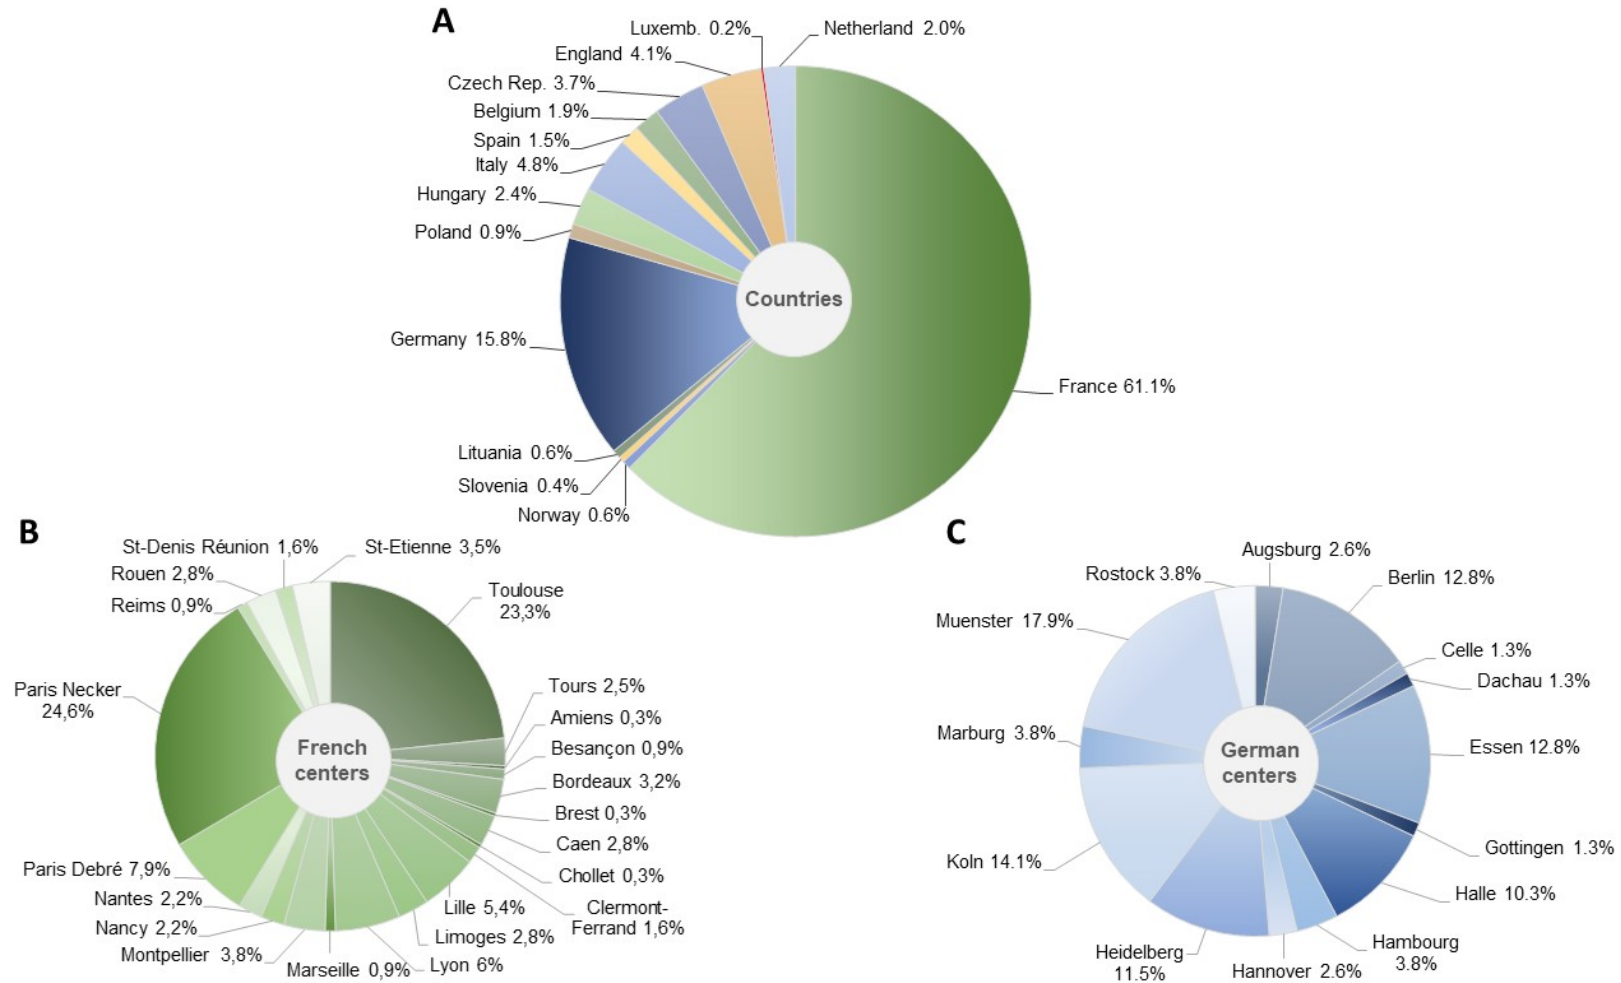

**Supplementary Figure S1: An international multicenter study. A)** 14 European countries participated in the study. A total of **B)** 22 centers from France and **C)** 14 centers from Germany, the two major participating countries, were involved.

**A**

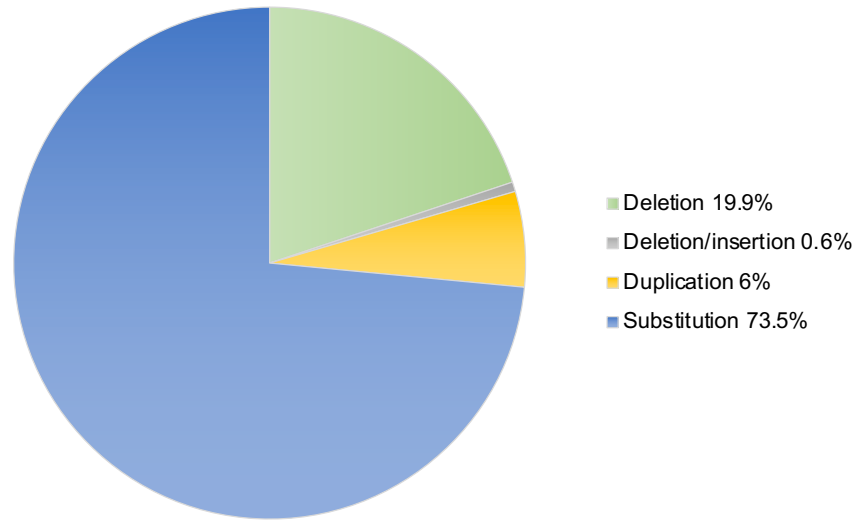

**B**

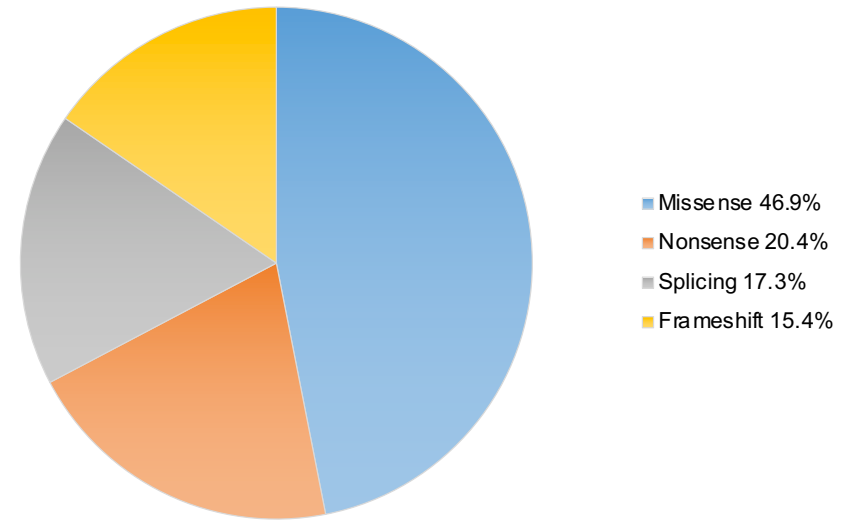

**Supplementary Figure S2: Distribution of *HNF1B* variants other than the 17q12del. A) Nature of variants and B) Resulting variants.**

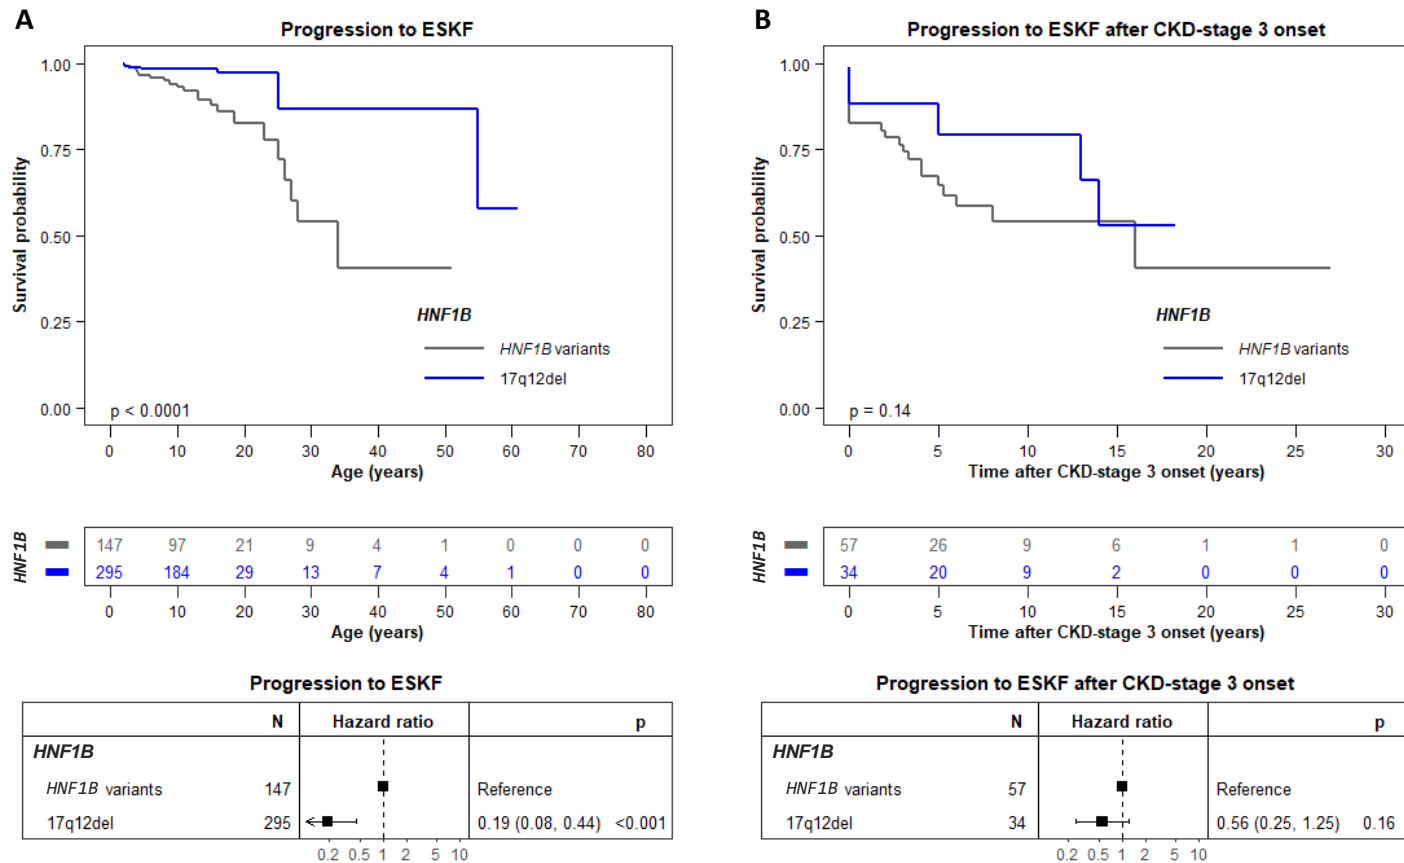

**Supplementary Figure S3: Progression to ESKF of patients with *HNF1B* disease. A)** Progression to ESKF is significantly delayed in patients with the 17q12del compared to patients with *HNF1B* variants. **B)** Progression to ESKF after developing CKD is not different between the 62 patients with *HNF1B* variants and 33 patients with the 17q12del. The survival curves were generated using data from children  $\geq 2$  years of age to dismiss changes in eGFR evolution in early life. The point in time of progression to ESKF was entered as the chronological age of each patient. We considered that patients entered the study (baseline) at birth given the fact the *HNF1B* disease is a congenital nephropathy. In **A)** The log rank test for difference in survival yielded a p-value of  $p < 0.0001$  indicating that the patients with 17q12del and *HNF1B* variants differed significantly in progression towards ESKF.

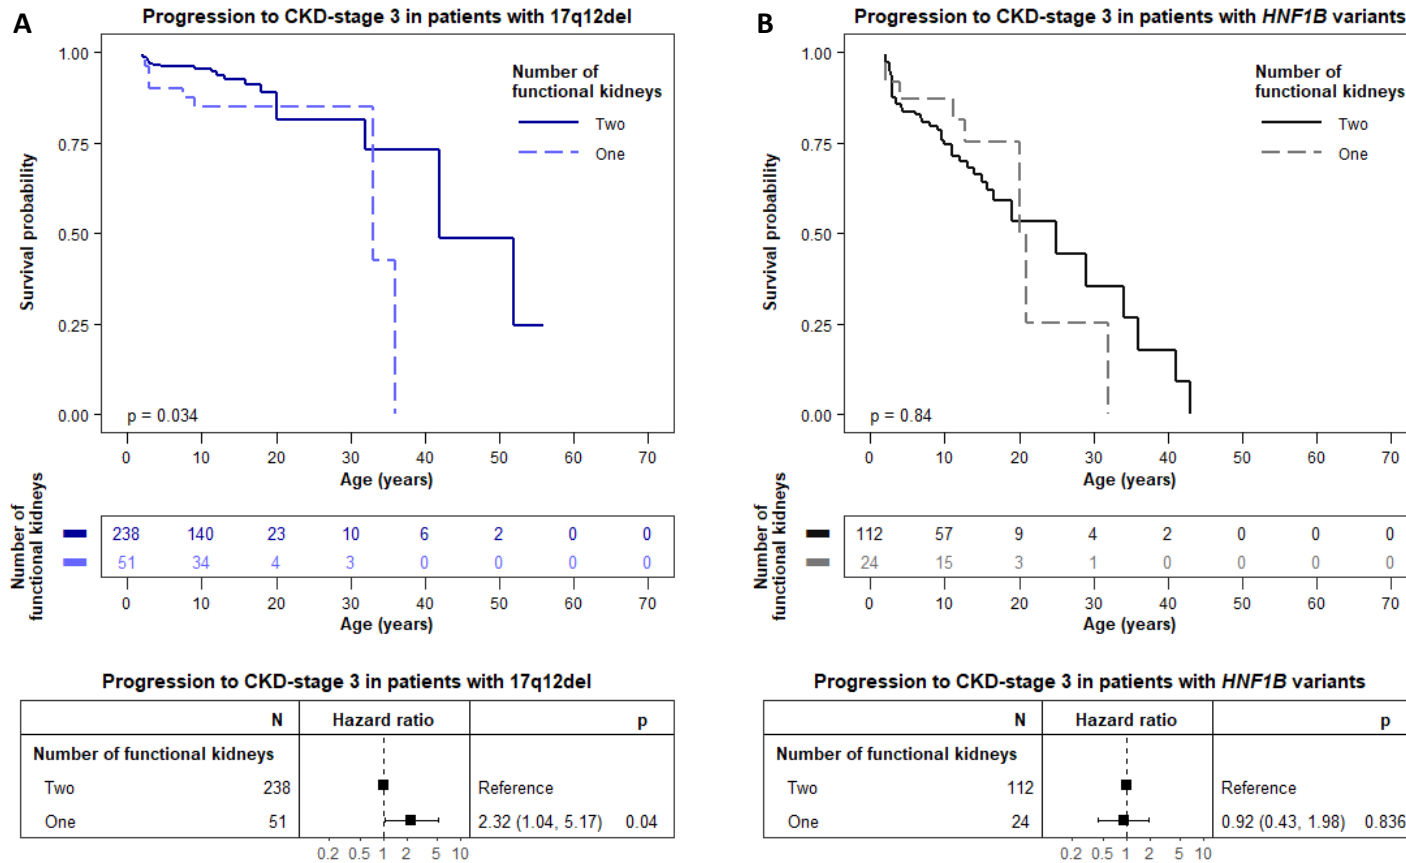

**Supplementary Figure S4: Impact of one or two functional kidneys in patients with *HNF1B* disease on progression to CKD-stage 3.** **A)** Kidney survival of patients with the 17q12del is worse in patients with one functional kidney. **B)** Kidney survival of patients with *HNF1B* variants is similar irrespective of the number of functional kidneys. The survival curves were generated using data from children  $\geq 2$  years of age to dismiss changes in eGFR in early life. The point in time of progression to CKD-stage 3 (eGFR  $< 60$  mL/min/1.73m<sup>2</sup>) was entered as the chronological age of each patient. We considered that patients entered the study (baseline) at birth given the fact the *HNF1B* disease is a congenital nephropathy. In **A)** The log rank test for difference in survival yielded a p-value of p = 0.034 indicating that the patients with 17q12del with one functional kidney differed significantly in progression towards CKD-stage 3.

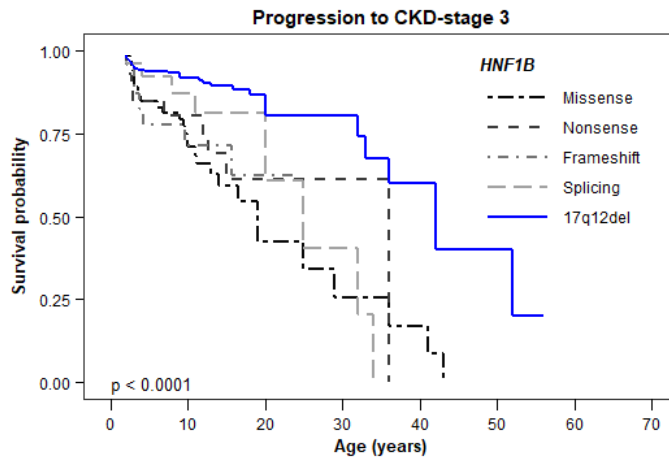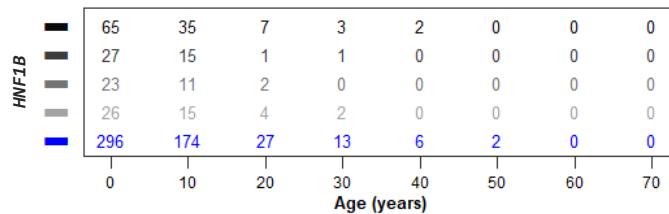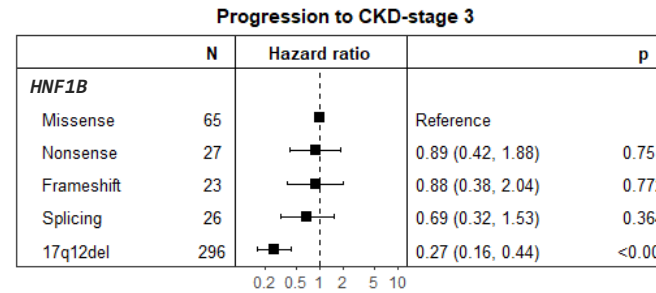

**Supplementary Figure S5: Impact of the nature of the change at the *HNF1B* protein level on progression to CKD-stage 3.** Kidney survival of patients is not different between missense, nonsense, splicing or frameshift *HNF1B* variants. The survival curves were generated using data from children >2 years of age to dismiss changes in eGFR in early life. The point in time of progression to CKD-stage 3 (eGFR < 60 mL/min/1.73m<sup>2</sup>) was entered as the chronological age of each patient. We considered that patients entered the study (baseline) at birth given the fact the *HNF1B* disease is a congenital nephropathy.

### 3. Supplementary tables

**Supplementary Table S1:** Characteristics of *HNF1B* gene variants.

**Supplementary Table S2:** Follow-up data of patients with *HNF1B* disease.



Supplementary Table S1: Characteristics of *HNF1B* variants

| Patient | cVariant          | Position | pVariant    | Allele frequency <sup>1</sup> | Mutation     | Mutation consequence | Pathogenicity_ClinVar <sup>2</sup> | Pathogenicity_LOVD <sup>3</sup>  | Pathogenicity_Leipzig_University <sup>4</sup> | Mutation pathogenicity |
|---------|-------------------|----------|-------------|-------------------------------|--------------|----------------------|------------------------------------|----------------------------------|-----------------------------------------------|------------------------|
| 1       | Exon 1-2 deletion | Exon 1   |             |                               | Deletion     |                      | NA                                 | NA                               | NA                                            | VUS                    |
| 2       | c.3G>A            | Exon 1   | p.Met1Ile   |                               | Substitution | Missense (non-start) | Pathogenic                         | Pathogenic                       | Likely pathogenic                             | Pathogenic             |
| 3       | c.3G>A            | Exon 1   | p.Met1Ile   |                               | Substitution | Missense (non-start) | Pathogenic                         | Pathogenic                       | Likely pathogenic                             | Pathogenic             |
| 4       | c.143del          | Exon 1   | p.Leu48fs   |                               | Deletion     | Frameshift           | Pathogenic                         | Pathogenic                       | Likely pathogenic                             | Pathogenic             |
| 5       | c.143del          | Exon 1   | p.Leu48fs   |                               | Deletion     | Frameshift           | Pathogenic                         | Pathogenic                       | Likely pathogenic                             | Pathogenic             |
| 6       | c.156del          | Exon 1   | p.Ser52fs   |                               | Deletion     | Frameshift           | NA                                 | Pathogenic                       | NA                                            | Pathogenic             |
| 7       | c.212_218del      | Exon 1   | p.Lys71fs   |                               | Deletion     | Frameshift           | NA                                 | Pathogenic                       | NA                                            | Pathogenic             |
| 8       | c.232G>T          | Exon 1   | p.Glu78Ter  | 6.85e-7                       | Substitution | Nonsense             | Pathogenic                         | Pathogenic                       | Pathogenic                                    | Pathogenic             |
| 9       | c.301G>A          | Exon 1   | p.Glu101Lys |                               | Substitution | Missense             | NA                                 | NA                               | NA                                            | VUS                    |
| 10      | c.313G>A          | Exon 1   | p.Glu105Lys | 6.35e-5                       | Substitution | Missense             | Likely benign/VUS                  | Effect unknown/Likely pathogenic | VUS                                           | VUS                    |
| 11      |                   | Exon 1   | p.Glu109fs  |                               | Deletion     | Frameshift           | NA                                 | Pathogenic                       | Likely pathogenic                             | Pathogenic             |
| 12      | c.341T>C          | Exon 1   | p.Leu114Pro |                               | Substitution | Missense             | NA                                 | NA                               | NA                                            | VUS                    |
| 13      | c.344G>A          | Exon 1   | p.Ser115Asn |                               | Substitution | Missense             | VUS/Likely pathogenic              | Likely pathogenic                | NA                                            | VUS                    |
| 14      | c.344+2           | Intron 1 |             |                               | Substitution | Splicing             | NA                                 | NA                               | NA                                            | VUS                    |
| 15      | c.345-1G>A        | Intron 1 |             |                               | Substitution | Splicing             | Pathogenic                         | Pathogenic                       | Likely pathogenic                             | Pathogenic             |
| 16      | c.345-1G>A        | Intron 1 |             |                               | Substitution | Splicing             | Pathogenic                         | Pathogenic                       | Likely pathogenic                             | Pathogenic             |
| 17      | c.372G>T          | Exon 2   | p.Met124Ile |                               | Substitution | Missense             | Likely pathogenic                  | Likely pathogenic                | NA                                            | Pathogenic             |
| 18      | c.374T>C          | Exon 2   | p.Ile125Thr |                               | Substitution | Missense             | Pathogenic                         | Pathogenic                       | Likely pathogenic                             | Pathogenic             |
| 19      | c.406C>G          | Exon 2   | p.Gln136Glu |                               | Substitution | Missense             | Pathogenic                         | Pathogenic                       | Likely pathogenic                             | Pathogenic             |
| 20      | c.412G>A          | Exon 2   | p.Glu138Lys |                               | Substitution | Missense             | NA                                 | Likely pathogenic                | Likely pathogenic                             | Pathogenic             |
| 21      | c.412G>A          | Exon 2   | p.Glu138Lys |                               | Substitution | Missense             | NA                                 | Likely pathogenic                | Likely pathogenic                             | Pathogenic             |
| 22      | c.412G>A          | Exon 2   | p.Glu138Lys |                               | Substitution | Missense             | NA                                 | Likely pathogenic                | Likely pathogenic                             | Pathogenic             |
| 23      | c.443C>T          | Exon 2   | p.Ser148Leu |                               | Substitution | Missense             | Likely pathogenic/Pathogenic       | Likely pathogenic/Pathogenic     | Pathogenic                                    | Pathogenic             |
| 24      | c.443C>T          | Exon 2   | p.Ser148Leu |                               | Substitution | Missense             | NA                                 | Likely pathogenic/Pathogenic     | Pathogenic                                    | Pathogenic             |
| 25      | c.443C>T          | Exon 2   | p.Ser148Leu |                               | Substitution | Missense             | Likely pathogenic/Pathogenic       | Likely pathogenic/Pathogenic     | Pathogenic                                    | Pathogenic             |
| 26      | c.443C>G          | Exon 2   | p.Ser148Trp |                               | Substitution | Missense             | Pathogenic                         | Likely pathogenic/Pathogenic     | Likely pathogenic                             | Pathogenic             |
| 27      | c.443C>G          | Exon 2   | p.Ser148Trp |                               | Substitution | Missense             | Pathogenic                         | Likely pathogenic/Pathogenic     | Likely pathogenic                             | Pathogenic             |
| 28      | c.443C>T          | Exon 2   | p.Ser148Leu |                               | Substitution | Missense             | Likely pathogenic/Pathogenic       | Likely pathogenic/Pathogenic     | Pathogenic                                    | Pathogenic             |
| 29      |                   | Exon 2   | p.Ser148Leu |                               | Substitution | Missense             | NA                                 | Likely pathogenic/Pathogenic     | Pathogenic                                    | Pathogenic             |
| 30      | c.451T>C          | Exon 2   | p.Ser151Pro |                               | Substitution | Missense             | Likely pathogenic                  | Likely pathogenic                | Likely pathogenic                             | Pathogenic             |
| 31      | c.452C>G          | Exon 2   | p.Ser151Cys |                               | Substitution | Missense             | Likely pathogenic                  | Likely pathogenic/Pathogenic     | Likely pathogenic                             | Pathogenic             |
| 32      | c.460C>T          | Exon 2   | p.Leu154Phe |                               | Substitution | Missense             | Likely pathogenic                  | Likely pathogenic                | NA                                            | Pathogenic             |
| 33      | c.476del          | Exon 2   | p.Pro159fs  |                               | Deletion     | Frameshift           | NA                                 | NA                               | NA                                            | VUS                    |
| 34      | c.479T>G          | Exon 2   | p.Met160Arg |                               | Substitution | Missense             | VUS                                | NA                               | NA                                            | VUS                    |
| 35      | c.487del          | Exon 2   | p.Gln163fs  |                               | Deletion     | Frameshift           | Pathogenic                         | Pathogenic                       | Likely pathogenic                             | Pathogenic             |
| 36      |                   | Exon 2   | p.Arg165His |                               | Substitution | Missense             | NA                                 | Likely pathogenic/Pathogenic     | Pathogenic                                    | Pathogenic             |
| 37      | c.494G>C          | Exon 2   | p.Arg165Pro |                               | Substitution | Missense             | Likely pathogenic                  | Likely pathogenic/Pathogenic     | Likely pathogenic                             | Pathogenic             |
| 38      | c.494G>A          | Exon 2   | p.Arg165His |                               | Substitution | Missense             | Likely pathogenic/Pathogenic       | Likely pathogenic/Pathogenic     | Pathogenic                                    | Pathogenic             |
| 39      | c.494G>A          | Exon 2   | p.Arg165His |                               | Substitution | Missense             | Likely pathogenic/Pathogenic       | Likely pathogenic/Pathogenic     | Pathogenic                                    | Pathogenic             |
| 40      |                   | Exon 2   | p.Arg165His |                               | Substitution | Missense             | NA                                 | Likely pathogenic/Pathogenic     | Pathogenic                                    | Pathogenic             |
| 41      | c.494G>A          | Exon 2   | p.Arg165His |                               | Substitution | Missense             | Likely pathogenic/Pathogenic       | Likely pathogenic/Pathogenic     | Pathogenic                                    | Pathogenic             |
| 42      | c.494G>A          | Exon 2   | p.Arg165His |                               | Substitution | Missense             | Likely pathogenic/Pathogenic       | Likely pathogenic/Pathogenic     | Pathogenic                                    | Pathogenic             |
| 43      | c.494G>A          | Exon 2   | p.Arg165His |                               | Substitution | Missense             | Likely pathogenic/Pathogenic       | Likely pathogenic/Pathogenic     | Pathogenic                                    | Pathogenic             |
| 44      | c.511T>C          | Exon 2   | p.Trp171Arg |                               | Substitution | Missense             | Likely pathogenic                  | Likely pathogenic/Pathogenic     | Likely pathogenic                             | Pathogenic             |
| 45      | c.512G>A          | Exon 2   | p.Trp171Ter |                               | Substitution | Nonsense             | NA                                 | Likely pathogenic/Pathogenic     | Likely pathogenic                             | Pathogenic             |
| 46      | c.512G>A          | Exon 2   | p.Trp171Ter |                               | Substitution | Nonsense             | NA                                 | Likely pathogenic/Pathogenic     | Likely pathogenic                             | Pathogenic             |
| 47      | c.513G>A          | Exon 2   | p.Trp171Ter |                               | Substitution | Nonsense             | Pathogenic                         | Likely pathogenic/Pathogenic     | Likely pathogenic                             | Pathogenic             |
| 48      | c.513G>A          | Exon 2   | p.Trp171Ter |                               | Substitution | Nonsense             | Pathogenic                         | Likely pathogenic/Pathogenic     | Likely pathogenic                             | Pathogenic             |
| 49      |                   | Exon 2   | p.Tyr172Ter |                               | Substitution | Nonsense             | NA                                 | NA                               | NA                                            | Pathogenic             |
| 50      |                   | Exon 2   | p.Gln174Glu |                               | Substitution | Missense             | NA                                 | NA                               | NA                                            | VUS                    |
| 51      |                   | Exon 2   | p.Lys175Ter |                               | Substitution | Nonsense             | NA                                 | NA                               | Likely pathogenic                             | VUS                    |
| 52      | c.526C>T          | Exon 2   | p.Gln176Ter |                               | Substitution | Nonsense             | Likely pathogenic/Pathogenic       | Pathogenic                       | Pathogenic                                    | Pathogenic             |
| 53      | c.529C>T          | Exon 2   | p.Arg177Ter |                               | Substitution | Nonsense             | Pathogenic                         | Pathogenic                       | Pathogenic                                    | Pathogenic             |
| 54      | c.529C>T          | Exon 2   | p.Arg177Ter |                               | Substitution | Nonsense             | Pathogenic                         | Pathogenic                       | Pathogenic                                    | Pathogenic             |
| 55      | c.529C>T          | Exon 2   | p.Arg177Ter |                               | Substitution | Nonsense             | Pathogenic                         | Pathogenic                       | Pathogenic                                    | Pathogenic             |
| 56      | c.541C>T          | Exon 2   | p.Arg181Ter |                               | Substitution | Nonsense             | Pathogenic                         | Pathogenic                       | Pathogenic                                    | Pathogenic             |
| 57      | c.541C>T          | Exon 2   | p.Arg181Ter |                               | Substitution | Nonsense             | Pathogenic                         | Pathogenic                       | Pathogenic                                    | Pathogenic             |
| 58      | c.541C>T          | Exon 2   | p.Arg181Ter |                               | Substitution | Nonsense             | Pathogenic                         | Pathogenic                       | Pathogenic                                    | Pathogenic             |
| 59      | c.544C>T          | Exon 2   | p.Gln182Ter |                               | Substitution | Nonsense             | Pathogenic                         | Pathogenic                       | Pathogenic                                    | Pathogenic             |
| 60      | c.544C>T          | Exon 2   | p.Gln182Ter |                               | Substitution | Nonsense             | NA                                 | Pathogenic                       | Pathogenic                                    | Pathogenic             |

|     |                      |          |             |         |  |                    |            |                              |                              |                   |            |
|-----|----------------------|----------|-------------|---------|--|--------------------|------------|------------------------------|------------------------------|-------------------|------------|
| 61  | c.544C>T             | Exon 2   | p.Gln182Ter |         |  | Substitution       | Nonsense   | Pathogenic                   | Pathogenic                   | Pathogenic        | Pathogenic |
| 62  | c.544C>T             | Exon 2   | p.Gln182Ter |         |  | Substitution       | Nonsense   | Pathogenic                   | Pathogenic                   | Pathogenic        | Pathogenic |
| 63  | c.544C>T             | Exon 2   | p.Gln182Ter |         |  | Substitution       | Nonsense   | Pathogenic                   | Pathogenic                   | Pathogenic        | Pathogenic |
| 64  | c.544C>T             | Exon 2   | p.Gln182Ter |         |  | Substitution       | Nonsense   | Pathogenic                   | Pathogenic                   | Pathogenic        | Pathogenic |
| 65  | c.544C>T             | Exon 2   | p.Gln182Ter |         |  | Substitution       | Nonsense   | Pathogenic                   | Pathogenic                   | Pathogenic        | Pathogenic |
| 66  | c.IV52+1_4del        | Intron 2 |             |         |  | Deletion           | Splicing   | NA                           | NA                           | NA                | VUS        |
| 67  | c.544+1G>C           | Intron 2 |             |         |  | Substitution       | Splicing   | Pathogenic                   | Pathogenic                   | Likely pathogenic | Pathogenic |
| 68  | c.544+1G>A           | Intron 2 |             |         |  | Substitution       | Splicing   | Pathogenic                   | Pathogenic                   | Pathogenic        | Pathogenic |
| 69  | c.544+1G>T           | Intron 2 |             |         |  | Substitution       | Splicing   | Pathogenic                   | Pathogenic                   | Pathogenic        | Pathogenic |
| 70  | c.544+1G>T           | Intron 2 |             |         |  | Substitution       | Splicing   | Pathogenic                   | Pathogenic                   | Pathogenic        | Pathogenic |
| 71  | c.544+1G>C           | Intron 2 |             |         |  | Substitution       | Splicing   | Pathogenic                   | Pathogenic                   | Likely pathogenic | Pathogenic |
| 72  | c.544+2              | Intron 2 |             |         |  |                    | Splicing   | NA                           | NA                           | NA                | VUS        |
| 73  | c.544+2dup           | Intron 2 |             |         |  | Duplication        | Splicing   | Pathogenic                   | Pathogenic                   | Pathogenic        | Pathogenic |
| 74  | c.544+3_544+6del     | Intron 2 |             |         |  | Deletion           | Splicing   | Likely pathogenic/Pathogenic | Likely pathogenic/Pathogenic | Likely pathogenic | Pathogenic |
| 75  | c.544+3_544+11delins | Intron 2 |             |         |  | Deletion/insertion | Splicing   | NA                           | NA                           | NA                | VUS        |
| 76  | c.544+3_544+6del     | Intron 2 |             |         |  | Deletion           | Splicing   | Likely pathogenic/Pathogenic | Likely pathogenic/Pathogenic | Likely pathogenic | Pathogenic |
| 77  | c.544+3_544+6del     | Intron 2 |             |         |  | Deletion           | Splicing   | Likely pathogenic/Pathogenic | Likely pathogenic/Pathogenic | Likely pathogenic | Pathogenic |
| 78  | c.544+3_544+6del     | Intron 2 |             |         |  | Deletion           | Splicing   | Likely pathogenic/Pathogenic | Likely pathogenic/Pathogenic | Likely pathogenic | Pathogenic |
| 79  | c.544+3_544+6del     | Intron 2 |             |         |  | Deletion           | Splicing   | Likely pathogenic/Pathogenic | Likely pathogenic/Pathogenic | Likely pathogenic | Pathogenic |
| 80  | c.544+3_544+6del     | Intron 2 |             |         |  | Deletion           | Splicing   | Likely pathogenic/Pathogenic | Likely pathogenic/Pathogenic | Likely pathogenic | Pathogenic |
| 81  | c.544+3_544+6del     | Intron 2 |             |         |  | Deletion           | Splicing   | Likely pathogenic/Pathogenic | Likely pathogenic/Pathogenic | Likely pathogenic | Pathogenic |
| 82  | c.544+3_544+6del     | Intron 2 |             |         |  | Deletion           | Splicing   | Likely pathogenic/Pathogenic | Likely pathogenic/Pathogenic | Likely pathogenic | Pathogenic |
| 83  | c.544+3_544+6del     | Intron 2 |             |         |  | Deletion           | Splicing   | Likely pathogenic/Pathogenic | Likely pathogenic/Pathogenic | Likely pathogenic | Pathogenic |
| 84  | Exon 3-8 duplication | Exon 3   |             |         |  | Duplication        |            | NA                           | NA                           | NA                | VUS        |
| 85  | Exon 3-8 duplication | Exon 3   |             |         |  | Duplication        |            | NA                           | NA                           | NA                | VUS        |
| 86  | c.605del             | Exon 3   | p.Leu202fs  |         |  | Deletion           | Frameshift | NA                           | Pathogenic                   | NA                | Pathogenic |
| 87  | c.628del             | Exon 3   | p.Ser210fs  |         |  | Deletion           | Frameshift | Pathogenic                   | Pathogenic                   | NA                | Pathogenic |
| 88  | c.694C>T             | Exon 3   | p.Arg232Cys | 1.37e-6 |  | Substitution       | Missense   | NA                           | NA                           | VUS               | VUS        |
| 89  | c.704G>A             | Exon 3   | p.Arg235Gln | 3.18e-6 |  | Substitution       | Missense   | VUS/Likely pathogenic        | Likely pathogenic/Pathogenic | Likely pathogenic | VUS        |
| 90  | c.708C>G             | Exon 3   | p.Phe236Leu |         |  | Substitution       | Missense   | NA                           | Likely pathogenic            | NA                | VUS        |
| 91  | c.708C>G             | Exon 3   | p.Phe236Leu |         |  | Substitution       | Missense   | NA                           | Likely pathogenic            | NA                | VUS        |
| 92  | c.713G>T             | Exon 3   | p.Trp238Leu |         |  | Substitution       | Missense   | NA                           | NA                           | VUS               | VUS        |
| 93  | c.717del             | Exon 3   | p.Ala241fs  |         |  | Deletion           | Frameshift | Pathogenic                   | Pathogenic                   | Likely pathogenic | Pathogenic |
| 94  | c.719_720dup         | Exon 3   | p.Ala241fs  |         |  | Duplication        | Frameshift | Likely pathogenic/Pathogenic | Pathogenic                   | NA                | Pathogenic |
| 95  | c.721G>A             | Exon 3   | p.Ala241Thr | 7.43e-6 |  | Substitution       | Missense   | VUS                          | VUS                          | VUS               | VUS        |
| 96  | c.721G>A             | Exon 3   | p.Ala241Thr | 7.43e-6 |  | Substitution       | Missense   | VUS                          | VUS                          | VUS               | VUS        |
| 97  | c.727C>T             | Exon 3   | p.Gln243Ter |         |  | Substitution       | Nonsense   | NA                           | NA                           | NA                | VUS        |
| 98  | c.738G>T             | Exon 3   | p.Leu246Phe |         |  | Substitution       | Missense   | VUS                          | Likely pathogenic            | NA                | VUS        |
| 99  | c.738G>T             | Exon 3   | p.Leu246Phe |         |  | Substitution       | Missense   | VUS                          | Likely pathogenic            | NA                | VUS        |
| 100 |                      | Exon 3   | p.Gln253Pro |         |  | Substitution       | Missense   | NA                           | Likely pathogenic            | VUS               | VUS        |
| 101 | c.781A>G             | Exon 3   | p.Arg261Gly |         |  | Substitution       | Missense   | VUS/Likely pathogenic        | Likely pathogenic            | VUS               | VUS        |
| 102 | c.809G>A             | Exon 3   | p.Arg270Lys |         |  | Substitution       | Missense   | NA                           | NA                           | NA                | VUS        |
| 103 | c.809G>C             | Exon 3   | p.Arg270Thr |         |  | Substitution       | Missense   | NA                           | NA                           | NA                | VUS        |
| 104 | c.809+1G>A           | Intron 3 |             |         |  | Substitution       | Splicing   | Pathogenic                   | Pathogenic                   | Likely pathogenic | Pathogenic |
| 105 | c.809+1G>A           | Intron 3 |             |         |  | Substitution       | Splicing   | Pathogenic                   | Pathogenic                   | Likely pathogenic | Pathogenic |
| 106 | Exon 4 deletion      | Exon 4   |             |         |  | Deletion           |            | NA                           | NA                           | NA                | VUS        |
| 107 | Exon 4 deletion      | Exon 4   |             |         |  | Deletion           | Frameshift | NA                           | NA                           | NA                | VUS        |
| 108 | c.826C>T             | Exon 4   | p.Arg276Ter |         |  | Substitution       | Nonsense   | Pathogenic                   | Pathogenic                   | Pathogenic        | Pathogenic |
| 109 | c.826C>T             | Exon 4   | p.Arg276Ter |         |  | Substitution       | Nonsense   | Pathogenic                   | Pathogenic                   | Pathogenic        | Pathogenic |
| 110 |                      | Exon 4   | p.Arg276Ter |         |  | Substitution       | Nonsense   | NA                           | Pathogenic                   | Pathogenic        | Pathogenic |
| 111 | c.827G>A             | Exon 4   | p.Arg276Gln |         |  | Substitution       | Missense   | Likely pathogenic/Pathogenic | Pathogenic                   | Pathogenic        | Pathogenic |
| 112 | c.827G>A             | Exon 4   | p.Arg276Gln |         |  | Substitution       | Missense   | Likely pathogenic/Pathogenic | Pathogenic                   | Pathogenic        | Pathogenic |
| 113 | c.827G>A             | Exon 4   | p.Arg276Gln |         |  | Substitution       | Missense   | Likely pathogenic/Pathogenic | Pathogenic                   | Pathogenic        | Pathogenic |
| 114 | c.850del             | Exon 4   | p.His284fs  |         |  | Deletion           | Frameshift | Pathogenic                   | Pathogenic                   | Likely pathogenic | Pathogenic |
| 115 | c.850del             | Exon 4   | p.His284fs  |         |  | Deletion           | Frameshift | Pathogenic                   | Pathogenic                   | Likely pathogenic | Pathogenic |
| 116 | c.854G>A             | Exon 4   | p.Gly285Asp |         |  | Substitution       | Missense   | Pathogenic                   | Likely pathogenic/Pathogenic | Likely pathogenic | Pathogenic |
| 117 | c.856C>G             | Exon 4   | p.Leu286Val |         |  | Substitution       | Missense   | Likely pathogenic            | Likely pathogenic            | NA                | Pathogenic |
| 118 | c.883C>T             | Exon 4   | p.Arg295Cys | 1.20e-6 |  | Substitution       | Missense   | Likely pathogenic/Pathogenic | Likely pathogenic/Pathogenic | Pathogenic        | Pathogenic |
| 119 | c.883C>T             | Exon 4   | p.Arg295Cys | 1.20e-6 |  | Substitution       | Missense   | Likely pathogenic/Pathogenic | Likely pathogenic/Pathogenic | Pathogenic        | Pathogenic |
| 120 | c.883C>T             | Exon 4   | p.Arg295Cys | 1.20e-6 |  | Substitution       | Missense   | Likely pathogenic/Pathogenic | Likely pathogenic/Pathogenic | Pathogenic        | Pathogenic |

|     |                    |          |             |         |              |            |                              |                              |                   |            |
|-----|--------------------|----------|-------------|---------|--------------|------------|------------------------------|------------------------------|-------------------|------------|
| 121 | c.883C>T           | Exon 4   | p.Arg295Cys | 1.20e-6 | Substitution | Missense   | Likely pathogenic/Pathogenic | Likely pathogenic/Pathogenic | Pathogenic        | Pathogenic |
| 122 | c.883C>T           | Exon 4   | p.Arg295Cys | 1.20e-6 | Substitution | Missense   | Likely pathogenic/Pathogenic | Likely pathogenic/Pathogenic | Pathogenic        | Pathogenic |
| 123 | c.883C>T           | Exon 4   | p.Arg295Cys | 1.20e-6 | Substitution | Missense   | Likely pathogenic/Pathogenic | Likely pathogenic/Pathogenic | Pathogenic        | Pathogenic |
| 124 | c.883C>T           | Exon 4   | p.Arg295Cys | 1.20e-6 | Substitution | Missense   | Likely pathogenic/Pathogenic | Likely pathogenic/Pathogenic | Pathogenic        | Pathogenic |
| 125 | c.883C>T           | Exon 4   | p.Arg295Cys | 1.20e-6 | Substitution | Missense   | Likely pathogenic/Pathogenic | Likely pathogenic/Pathogenic | Pathogenic        | Pathogenic |
| 126 | c.883C>T           | Exon 4   | p.Arg295Cys | 1.20e-6 | Substitution | Missense   | Likely pathogenic/Pathogenic | Likely pathogenic/Pathogenic | Pathogenic        | Pathogenic |
| 127 | c.883C>T           | Exon 4   | p.Arg295Cys | 1.20e-6 | Substitution | Missense   | Likely pathogenic/Pathogenic | Likely pathogenic/Pathogenic | Pathogenic        | Pathogenic |
| 128 | c.883C>T           | Exon 4   | p.Arg295Cys | 1.20e-6 | Substitution | Missense   | Likely pathogenic/Pathogenic | Likely pathogenic/Pathogenic | Pathogenic        | Pathogenic |
| 129 | c.895T>G           | Exon 4   | p.Tyr299Gly |         | Substitution | Missense   | Likely pathogenic            | Likely pathogenic            | VUS               | Pathogenic |
| 130 | c.904A>G           | Exon 4   | p.Asn302Asp |         | Substitution | Missense   | Likely pathogenic            | Likely pathogenic            | NA                | Pathogenic |
| 131 | c.906C>A           | Exon 4   | p.Asn302Lys |         | Substitution | Missense   | Likely pathogenic            | Likely pathogenic            | VUS               | Pathogenic |
| 132 | c.907G>T           | Exon 4   | p.Arg303Cys |         | Substitution | Missense   | NA                           | Likely pathogenic            | NA                | VUS        |
| 133 | c.929G>A           | Exon 4   | p.Arg310Gln | 3.42e-6 | Substitution | Missense   | NA                           | VUS                          | NA                | VUS        |
| 134 | c.949del           | Exon 4   | p.Ala317fs  |         | Deletion     | Frameshift | Pathogenic                   | Pathogenic                   | Likely pathogenic | Pathogenic |
| 135 | c.953dup           | Exon 4   | p.Tyr318Ter |         | Duplication  | Nonsense   | Pathogenic                   | Pathogenic                   | NA                | Pathogenic |
| 136 | c.964del           | Exon 4   | p.Gln322fs  |         | Deletion     | Frameshift | NA                           | NA                           | NA                | VUS        |
| 137 | c.964del           | Exon 4   | p.Gln322fs  |         | Deletion     | Frameshift | NA                           | NA                           | NA                | VUS        |
| 138 | c.1006dup          | Exon 4   | p.His336fs  |         | Duplication  | Frameshift | Likely pathogenic/Pathogenic | Pathogenic                   | Pathogenic        | Pathogenic |
| 139 | c.1037A>G          | Exon 4   | p.Lys346Arg |         | Substitution | Missense   | NA                           | NA                           | NA                | VUS        |
| 140 | c.1037A>G          | Exon 4   | p.Lys346Arg |         | Substitution | Missense   | NA                           | NA                           | NA                | VUS        |
| 141 | c.1046-2A>C        | Intron 4 |             |         | Substitution | Splicing   | NA                           | NA                           | NA                | VUS        |
| 142 | c.1046-2A>G        | Intron 4 |             |         | Substitution | Splicing   | Pathogenic                   | Likely pathogenic/Pathogenic | VUS               | VUS        |
| 143 | Exon 5 duplication | Exon 5   |             |         | Duplication  |            | NA                           | NA                           | NA                | VUS        |
| 144 | Exon 5 duplication | Exon 5   |             |         | Duplication  |            | NA                           | NA                           | NA                | VUS        |
| 145 | c.1099A>G          | Exon 5   | p.Ser367Gly | 1.86e-5 | Substitution | Missense   | NA                           | NA                           | VUS               | VUS        |
| 146 | c.1136C>A          | Exon 5   | p.Ser379Ter |         | Substitution | Nonsense   | Pathogenic                   | Pathogenic                   | Likely pathogenic | Pathogenic |
| 147 | c.1207-1G>T        | Intron 5 |             |         | Substitution | Splicing   | NA                           | NA                           | NA                | VUS        |
| 148 | Exon 6 deletion    | Exon 6   |             |         | Deletion     | Frameshift | NA                           | NA                           | NA                | VUS        |
| 149 | c.1211_1212del     | Exon 6   | p.Ser404fs  |         | Deletion     | Frameshift | NA                           | NA                           | Likely pathogenic | VUS        |
| 150 | c.1253A>T          | Exon 6   | p.Asn418Ile |         | Substitution | Missense   | Likely pathogenic            | Likely pathogenic            | NA                | Pathogenic |
| 151 | c.1310C>T          | Exon 6   | p.Pro437Leu |         | Substitution | Missense   | Likely pathogenic            | Likely pathogenic            | NA                | Pathogenic |
| 152 | c.1310C>T          | Exon 6   | p.Pro437Leu |         | Substitution | Missense   | Likely pathogenic            | Likely pathogenic            | NA                | Pathogenic |
| 153 | c.1326G>A          | Exon 6   | p.Met442Ile | 1.59e-6 | Substitution | Missense   | NA                           | NA                           | NA                | VUS        |
| 154 | c.1340-1G>A        | Intron 6 |             |         | Substitution | Splicing   | NA                           | NA                           | Likely pathogenic | VUS        |
| 155 | c.1340-1G>A        | Intron 6 |             |         | Substitution | Splicing   | NA                           | NA                           | Likely pathogenic | VUS        |
| 156 | c.1360_1361del     | Exon 7   | p.Gln454fs  |         | Deletion     | Frameshift | Pathogenic                   | Pathogenic                   | NA                | Pathogenic |
| 157 | c.1363_1364del     | Exon 7   | p.Gln454Ter |         | Substitution | Nonsense   | NA                           | Pathogenic                   | Likely pathogenic | Pathogenic |
| 158 | c.1363_1364del     | Exon 7   | p.Ser455fs  |         | Deletion     | Frameshift | Pathogenic                   | Pathogenic                   | Likely pathogenic | Pathogenic |
| 159 | c.1363_1364del     | Exon 7   | p.Ser455fs  |         | Deletion     | Frameshift | Pathogenic                   | Pathogenic                   | Likely pathogenic | Pathogenic |
| 160 | c.1398_1405dup     | Exon 7   | p.Leu469fs  |         | Duplication  | Frameshift | NA                           | NA                           | NA                | VUS        |
| 161 | c.1399_1414dup     | Exon 7   | p.Val472fs  |         | Duplication  | Frameshift | NA                           | Pathogenic                   | NA                | Pathogenic |
| 162 | c.1408C>T          | Exon 7   | p.Gln470Ter |         | Substitution | Nonsense   | Pathogenic                   | Pathogenic                   | Likely pathogenic | Pathogenic |
| 163 | c.1408C>T          | Exon 7   | p.Gln470Ter |         | Substitution | Nonsense   | Pathogenic                   | Pathogenic                   | Likely pathogenic | Pathogenic |
| 164 | c.1489C>T          | Exon 7   | p.Gln497Ter |         | Substitution | Nonsense   | NA                           | Pathogenic                   | NA                | Pathogenic |
| 165 | c.1492C>T          | Exon 7   | p.Gln498Ter |         | Substitution | Nonsense   | NA                           | NA                           | Pathogenic        | Pathogenic |
| 166 | c.1538A>G          | Exon 8   | p.Tyr513Cys | 1.20e-6 | Substitution | Missense   | Likely pathogenic            | Likely pathogenic            | NA                | Pathogenic |
| 167 | c.1561C>T          | Exon 8   | p.Gln521Ter |         | Substitution | Nonsense   | Likely pathogenic/Pathogenic | Pathogenic                   | NA                | Pathogenic |
| 168 | c.1610C>A          | Exon 8   | p.Thr537Asn |         | Substitution | Missense   | VUS                          | VUS                          | NA                | VUS        |
| 169 | c.182T>G           | Exon 1   | p.Val61Gly  | 3.48e-4 | Substitution | Missense   | Benign/Likely benign/VUS     | Likely benign/VUS            | Likely benign     | Benign     |
| 170 | c.182T>G           | Exon 1   | p.Val61Gly  | 3.48e-4 | Substitution | Missense   | Benign/Likely benign/VUS     | Likely benign/VUS            | Likely benign     | Benign     |
| 171 | c.182T>G           | Exon 1   | p.Val61Gly  | 3.48e-4 | Substitution | Missense   | Benign/Likely benign/VUS     | Likely benign/VUS            | Likely benign     | Benign     |
| 172 | c.182T>G           | Exon 1   | p.Val61Gly  |         | Substitution | Missense   | NA                           | Likely benign/VUS            | Likely benign     | Benign     |
| 173 | c.182T>G           | Exon 1   | p.Gly76Cys  |         | Substitution | Missense   | Benign/Likely benign/VUS     | Benign/Likely benign/VUS     | VUS               | Benign     |
| 174 | c.182T>G           | Exon 1   | p.Gly76Cys  |         | Substitution | Missense   | Benign/Likely benign/VUS     | Benign/Likely benign/VUS     | VUS               | Benign     |
| 175 | c.226G>T           | Exon 1   | p.Gly76Cys  | 3.99e-4 | Substitution | Missense   | Likely benign/VUS            | Benign/Likely benign/VUS     | VUS               | Benign     |
| 176 | c.226G>T           | Exon 1   | p.Gly76Cys  | 3.99e-4 | Substitution | Missense   | Likely benign/VUS            | Benign/Likely benign/VUS     | VUS               | Benign     |
| 177 | c.226G>T           | Exon 1   | p.Gly76Cys  |         | Substitution | Missense   | Benign/Likely benign/VUS     | Benign/Likely benign/VUS     | VUS               | Benign     |
| 178 | c.244G>A           | Exon 1   | p.Asp82Asn  | 9.36e-4 | Substitution | Missense   | Benign/Likely benign/VUS     | Likely benign/VUS            | VUS               | Benign     |
| 179 | c.244G>A           | Exon 1   | p.Asp82Asn  | 9.36e-4 | Substitution | Missense   | Benign/Likely benign/VUS     | Likely benign/VUS            | VUS               | Benign     |
| 180 | c.684C>G           | Exon 3   | p.Asn228Lys | 4.55e-4 | Substitution | Missense   | Benign/Likely benign         | Likely benign                | Likely benign     | Benign     |
| 181 | c.684C>G           | Exon 4   | p.His336Asp |         | Substitution | Missense   | NA                           | VUS                          | VUS               | Benign     |

[https://gnomad.broadinstitute.org/gene/ENSG00000275410?dataset=gnomad\\_r4](https://gnomad.broadinstitute.org/gene/ENSG00000275410?dataset=gnomad_r4) (db accessed April 04, 2024)

<https://www.ncbi.nlm.nih.gov/clinvar> (db accessed July 11, 2023)

[https://databases.livd.nl/shared/variants/HNF1B#object\\_id=VariantOnTranscript%2CVariantOnGenome&id=HNF1B&order=VariantOnTranscript%2FDNA%2CASC&search\\_transcriptid=00009498&search\\_VariantOnTranscript/DNA=c.738G%3ET&page\\_size=100&page=1](https://databases.livd.nl/shared/variants/HNF1B#object_id=VariantOnTranscript%2CVariantOnGenome&id=HNF1B&order=VariantOnTranscript%2FDNA%2CASC&search_transcriptid=00009498&search_VariantOnTranscript/DNA=c.738G%3ET&page_size=100&page=1) (db accessed November 15, 2023)

<https://hnf1b.uni-leipzig.de/> (db accessed July 11, 2023) and Vasileiou G & al, Prenat Diagn. 2019 Nov;39(12):1136-1147

NA: not available; VUS: variant of uncertain significance

Patients highlighted in grey are those with a benign *HNF1B* variant; they were excluded from the analysis.

**Supplementary Table S2:** Follow-up data of patients with *HNF1B* disease.

|                                   | N   | <i>HNF1B</i>           |           |                      |                      |        |
|-----------------------------------|-----|------------------------|-----------|----------------------|----------------------|--------|
|                                   |     | <i>HNF1B</i> variants  | 17q12del  | p.value <sup>3</sup> | q.value <sup>4</sup> |        |
| <b>All</b>                        | 508 |                        | 168       | 340                  |                      |        |
| <b>Number of visits</b>           | 508 | 6 (4-9)                | 6 (3-9)   | 6 (4-8)              | 0.976                | 0.976  |
| <b>Duration of follow-up (y)</b>  | 500 | 11 (7-17) <sup>1</sup> | 12 (8-17) | 11 (6-16)            | 0.143                | 0.166  |
| <b>Progression to CKD-stage 3</b> | 473 | 99 (21%) <sup>2</sup>  | 61 (39%)  | 38 (12%)             | <0.001               | <0.001 |
| <b>Progression to ESKF</b>        | 472 | 37 (7.8%)              | 26 (16%)  | 11 (3.5%)            | <0.001               | <0.001 |
| <b>Hypomagnesemia</b>             | 437 | 127 (29%)              | 27 (19%)  | 100 (34%)            | 0.002                | 0.005  |
| <b>Hyperuricemia</b>              | 433 | 283 (65%)              | 106 (74%) | 177 (61%)            | 0.011                | 0.019  |
| <b>Hyperglycemia</b>              | 486 | 60 (12%)               | 26 (16%)  | 34 (10%)             | 0.067                | 0.094  |

<sup>1</sup>Median (25%-75%); <sup>2</sup>n (%); <sup>3</sup>Wilcoxon rank sum test; Pearson's Chi-squared test; <sup>4</sup>False discovery rate correction for multiple testing

STROBE Statement—Checklist of items that should be included in reports of *cohort studies*

|                           | Item No | Recommendation                                                                                                                                                                                    | Page No                            |
|---------------------------|---------|---------------------------------------------------------------------------------------------------------------------------------------------------------------------------------------------------|------------------------------------|
| <b>Title and abstract</b> | 1       | (a) Indicate the study's design with a commonly used term in the title or the abstract                                                                                                            | 1                                  |
|                           |         | (b) Provide in the abstract an informative and balanced summary of what was done and what was found                                                                                               | 4                                  |
| <b>Introduction</b>       |         |                                                                                                                                                                                                   |                                    |
| Background/rationale      | 2       | Explain the scientific background and rationale for the investigation being reported                                                                                                              | 6-7                                |
| Objectives                | 3       | State specific objectives, including any prespecified hypotheses                                                                                                                                  | 7                                  |
| <b>Methods</b>            |         |                                                                                                                                                                                                   |                                    |
| Study design              | 4       | Present key elements of study design early in the paper                                                                                                                                           | 11, Fig 1                          |
| Setting                   | 5       | Describe the setting, locations, and relevant dates, including periods of recruitment, exposure, follow-up, and data collection                                                                   | 8-10                               |
| Participants              | 6       | (a) Give the eligibility criteria, and the sources and methods of selection of participants. Describe methods of follow-up                                                                        | 8,11                               |
|                           |         | (b) For matched studies, give matching criteria and number of exposed and unexposed                                                                                                               | n.a.                               |
| Variables                 | 7       | Clearly define all outcomes, exposures, predictors, potential confounders, and effect modifiers. Give diagnostic criteria, if applicable                                                          | 8                                  |
| Data sources/measurement  | 8*      | For each variable of interest, give sources of data and details of methods of assessment (measurement). Describe comparability of assessment methods if there is more than one group              | 8-10                               |
| Bias                      | 9       | Describe any efforts to address potential sources of bias                                                                                                                                         | 8-10                               |
| Study size                | 10      | Explain how the study size was arrived at                                                                                                                                                         | n.a.                               |
| Quantitative variables    | 11      | Explain how quantitative variables were handled in the analyses. If applicable, describe which groupings were chosen and why                                                                      | 9-10                               |
| Statistical methods       | 12      | (a) Describe all statistical methods, including those used to control for confounding                                                                                                             | 9-10                               |
|                           |         | (b) Describe any methods used to examine subgroups and interactions                                                                                                                               | 9-10                               |
|                           |         | (c) Explain how missing data were addressed                                                                                                                                                       | n.a.                               |
|                           |         | (d) If applicable, explain how loss to follow-up was addressed                                                                                                                                    | n.a.                               |
|                           |         | (e) Describe any sensitivity analyses                                                                                                                                                             | n.a.                               |
| <b>Results</b>            |         |                                                                                                                                                                                                   |                                    |
| Participants              | 13*     | (a) Report numbers of individuals at each stage of study—eg numbers potentially eligible, examined for eligibility, confirmed eligible, included in the study, completing follow-up, and analysed | 11, Fig 1, Table 1, Suppl Table S2 |
|                           |         | (b) Give reasons for non-participation at each stage                                                                                                                                              | n.a.                               |
|                           |         | (c) Consider use of a flow diagram                                                                                                                                                                | n.a.                               |
| Descriptive data          | 14*     | (a) Give characteristics of study participants (eg demographic, clinical, social) and information on exposures and potential confounders                                                          | 11, Fig 1, Table 1, Suppl Table S2 |
|                           |         | (b) Indicate number of participants with missing data for each variable of interest                                                                                                               | Table 2                            |
|                           |         | (c) Summarise follow-up time (eg, average and total amount)                                                                                                                                       | Suppl Table S2                     |
| Outcome data              | 15*     | Report numbers of outcome events or summary measures over time                                                                                                                                    | Suppl Table S2                     |

|                          |    |                                                                                                                                                                                                                                                                                                                                                                                                               |                         |
|--------------------------|----|---------------------------------------------------------------------------------------------------------------------------------------------------------------------------------------------------------------------------------------------------------------------------------------------------------------------------------------------------------------------------------------------------------------|-------------------------|
| Main results             | 16 | (a) Give unadjusted estimates and, if applicable, confounder-adjusted estimates and their precision (eg, 95% confidence interval). Make clear which confounders were adjusted for and why they were included<br>(b) Report category boundaries when continuous variables were categorized<br>(c) If relevant, consider translating estimates of relative risk into absolute risk for a meaningful time period | 11-13<br>11-13<br>11-13 |
| Other analyses           | 17 | Report other analyses done—eg analyses of subgroups and interactions, and sensitivity analyses                                                                                                                                                                                                                                                                                                                | 11-13                   |
| <b>Discussion</b>        |    |                                                                                                                                                                                                                                                                                                                                                                                                               |                         |
| Key results              | 18 | Summarise key results with reference to study objectives                                                                                                                                                                                                                                                                                                                                                      | 14                      |
| Limitations              | 19 | Discuss limitations of the study, taking into account sources of potential bias or imprecision. Discuss both direction and magnitude of any potential bias                                                                                                                                                                                                                                                    | 13                      |
| Interpretation           | 20 | Give a cautious overall interpretation of results considering objectives, limitations, multiplicity of analyses, results from similar studies, and other relevant evidence                                                                                                                                                                                                                                    | 11-13                   |
| Generalisability         | 21 | Discuss the generalisability (external validity) of the study results                                                                                                                                                                                                                                                                                                                                         | 11-13                   |
| <b>Other information</b> |    |                                                                                                                                                                                                                                                                                                                                                                                                               |                         |
| Funding                  | 22 | Give the source of funding and the role of the funders for the present study and, if applicable, for the original study on which the present article is based                                                                                                                                                                                                                                                 | 17                      |

\*Give information separately for exposed and unexposed groups.

**Note:** An Explanation and Elaboration article discusses each checklist item and gives methodological background and published examples of transparent reporting. The STROBE checklist is best used in conjunction with this article (freely available on the Web sites of PLoS Medicine at <http://www.plosmedicine.org/>, Annals of Internal Medicine at <http://www.annals.org/>, and Epidemiology at <http://www.epidem.com/>). Information on the STROBE Initiative is available at <http://www.strobe-statement.org>.
